# Supplementary material for: DrugDevCovid19: An Atlas of Anti-COVID-19 Compounds Derived By Computer-Aided Drug Design
Source: Research Square preprint supplement (doi:10.21203/rs.3.rs-1045472/v1), 2021-11-09
Supplement: Supplementary file 1 [file 2257c8f7d3958b9cfc97bfcd.xlsx]

## Sheet: The pockets of target proteins
Target	Pockets	Representative structure (PDB ID or link)	Pocket residues in the representative structure	Function
nsp1	40s ribosomal subunit binding site	http://clab.labshare.cn/covid/mols_classified_by_targets/nsp1/40s_ribosomal_subunit_binding_site/QHD43415_1-rec.pdb	Chain A: M1 E2 G7 N9 V35 F70 K72 R73 S74 D75 A76 R77 T78 V84 M85 E87 V89 A90 E91 I95 Q96 Y97 R99 S100 G101 E102 L145 Y154 E155 D156 F157 N162 T163 K164 H165 S166 S167 G168 V169 L173 M174 R175 E176 L177 N178	binds to the host 40S subunit in ribosomal complexes
	Predicted binding site 1	7K7P	Chain B: E1 K2 T3 H4 V5 L7 S8 L9 F22 E27 L30 S31 E32 R34 Q35 H36 L37 K38 D39 G40 C42 I62 E78 L79 Y88 V112 L114 R115 K116 N117	unknown
	Predicted binding site 2	7K7P	Chain B: T3 H4 Q6 L7 L9 L37 I62 R64 S65 D66 A67 R68 T69 A70 P71 H72 G73 H74 V75 M76 V77 E78 G92 E93 T94 L95 R110 K111 V112 L113 L114 R115 K116	unknown
PLpro	S1/S2 pockets	6W9C	Chain A: K92 W93 K94 P96 I104 K105 W106 A107 D108 N109 N110 C111 Y112 L113 A114 T115 L118 L152 G160 E161 L162 E263 T265 Q269 C270 G271 H272 Y273 K274 H275 C284 I285 D286 G287 A288 L289 L290 T291	The substrate binding site, the region where the catalytic site is located.
	S3/S4 pockets	7CMD	Chain A: N109 C111 Y112 L113 T115 A116 T119 K157 G160 E161 L162 G163 D164 V165 R166 E167 T168 M169 S170 Y171 Q174 V202 E203 M206 Y207 M208 G209 L211 M243 S245 A246 P247 P248 S262 Y264 T265 G266 N267 Y268 Q269 C270 G271 Y273 H275 P299 T301 D302 F304	The substrate binding site
Mpro	Catalytic pocket	6LU7	Chain A: C22 G23 T24 T25 T26 L27 R40 H41 V42 I43 C44 T45 S46 E47 D48 M49 L50 P52 Y54 K61 Y118 N119 K137 F140 L141 N142 G143 S144 C145 H163 H164 M165 E166 L167 P168 T169 G170 V171 H172 F181 V186 D187 R188 Q189 T190 A191 Q192 A193 A194	The substrate binding site, the region where the catalytic site is located.
nsp9	RNA binding site	6W4B	Chain B: Q12 M13 S14 C15 A16 G18 T19 T20 Q21 T22 A23 C24 D26 D27 N28 A29 L30 Y32 Y33 N34 T35 T36 K37 G38 G39 R40 F41 V42 A44 L45 L46 S47 D51 L52 K53 W54 A55 R56 F57 P58 K59 S60 D61 G62 T63 G64 T65 I66 Y67 T68 E69 L70 E71 L89 Y90 F91 I92 K93 G94 L95 N96 N99 R100 V103	RNA binding site
	Predicted binding site	6W4B	Chain B: Q12 M13 S14 C15 A16 G18 T19 T20 Q21 T22 A23 C24 D26 D27 N28 A29 L30 Y32 Y33 N34 T35 T36 K37 G38 G39 R40 F41 V42 A44 L45 L46 S47 D51 L52 K53 W54 A55 R56 F57 P58 K59 S60 D61 G62 T63 G64 T65 I66 Y67 T68 E69 L70 E71 L89 Y90 F91 I92 K93 G94 L95 N96 N99 R100 V103	RNA binding site
RdRp	Catalytic pocket	7BV2	Chain A: K438 H439 D452 Y455 F480 K500 K545 A547 I548 S549 A550 K551 R553 A554 R555 T556 V557 I579 V587 V588 I589 G590 T591 K593 W598 M601 L602 G616 W617 D618 Y619 P620 K621 C622 D623 R624 M626 T680 S682 T687 A688 Y689 N691 S692 F694 M756 L758 S759 D760 D761 A762 N790 V792 M794 E796 A797 K798 C799 W800 P809 H810 E811 F812 C813 S814 Q815 H816 T817 P830 P832 D833 R836 I837 A840 S861 L862 D865 Y925	The binding sites of NTP, the binding sites of the RNA template strand and primer strand
Helicase	ATP binding site	6XEZ	Chain E: E261 F262 S263 S264 N265 G285 T286 G287 K288 S289 H290 F291 I293 A316 L317 E319 K320 K323 Y324 L438 G439 T440 C441 R442 R443 C444 P445 A446 E447 I448 V449 D450 V452 S453 L461 K462 A463 H464 K465 D466 K467 S468 Q470 A505 W506 V510 I512 G538 S539 E540 Y541 D542 Y543 V544 A564 I565 T566 R567 K569 V570 I572	ATP binding site
	Nucleic acids binding site	6XEZ	Chain E: K139 E142 E143 F145 K146 L147 S148 Y149 G150 I151 A152 T153 R155 R161 E162 L163 L165 S166 W167 E168 V169 G170 K171 P172 R173 P174 P175 L176 N177 R178 N179 Y180 V181 F182 T183 Y185 Q194 G196 E197 T199 F200 E201 K202 G203 D204 Y205 D207 A208 V209 V210 Y211 R212 G213 T214 F225 V226 L227 T228 S229 H230 T231 V232 M233 P234 L235 H311 A312 D315 R332 I333 I334 P335 A336 R337 A338 R339 V340 E341 …	RNA binding site
ExoN	Exoribonuclease active site	http://clab.labshare.cn/covid/mols_classified_by_targets/nsp14/Exoribonuclease_active_site/QHD43415_13-rec.pdb	Chain A: T5 G6 L7 K9 S56 M57 M58 G59 F60 K61 D90 V91 E92 G93 C94 H95 V101 G102 T103 N104 L107 K139 P140 P141 P142 G143 D144 Q145 F146 K147 H148 L149 I150 P151 W159 W186 A187 H188 G189 F190 E191 Y197 D243 V244 Q245 Q246 F249 G251 N252 L253 Q254 S255 D258 N266 H268 A270 D273 T277	Exoribonuclease active site
	Methyltransferase active site	http://clab.labshare.cn/covid/mols_classified_by_targets/nsp14/Exoribonuclease_active_site/QHD43415_13-rec.pdb	Chain A: I80 R81 C285 F286 V287 K288 R289 V290 D291 W292 T293 I294 E295 Y296 I298 E302 L303 I305 N306 A307 A308 C309 R310 K311 V312 Q313 H314 L329 D331 I332 G333 N334 P335 K336 A337 I338 K339 C340 P342 Q343 W348 F350 Y351 D352 A353 Q354 P355 C356 S357 D358 K359 A360 K362 E365 L366 F367 Y368 F377 W385 N386 C387 N388 V389 C399 F401 D402 L419 Y420 V421 N422 K423 H424 A425 F426 H427 T428 P429 M501 G5…	Methyltransferase active site
NendoU	Catalytic pocket	6W01	Chain A: H235 I236 D240 H243 Q245 L246 G247 G248 H250 L251 F269 N278 F280 S289 K290 C291 V292 S294 I296 F303 V315 S316 F330 M331 W333 C334 K335 E340 T341 F342 Y343 P344 K345 L346	The C-terminal catalytic NendoU domain, Mn2+-dependent endoribonuclease activity
nsp16	PPI surface (nsp16/nsp10)	6W4H	Chain A: T6833 L6834 P6835 K6836 G6837 I6838 M6839 M6840 N6841 V6842 A6843 K6844 Y6845 T6846 L6848 Q6850 N6853 H6867 G6869 A6870 G6871 S6872 D6873 K6874 G6875 V6876 A6877 P6878 G6879 T6880 A6881 V6882 R6884 Q6885 W6886 L6887 P6888 T6889 G6890 T6891 L6893 D6895 D6897 L6898 N6899 D6900 F6901 V6902 S6903 D6904 A6905 D6906 S6907 T6908 I6910 D6928 F7003 L7042 F7043 D7044 M7045 S7046 K7047 F7048 P7049 …	The site interacting with nsp10
	SAM binding site	6W4H	Chain A: L6820 E6821 C6823 D6824 L6825 Y6828 G6829 D6830 S6831 A6832 I6838 M6840 N6841 A6843 K6844 Y6845 T6846 L6848 C6849 L6852 I6866 H6867 F6868 G6869 A6870 G6871 S6872 D6873 K6874 G6875 P6878 G6879 T6880 L6883 S6896 D6897 L6898 N6899 D6900 F6901 T6908 G6911 D6912 C6913 A6914 V6916 I6926 S6927 D6928 M6929 Y6930 D6931 P6932 K6933 T6934 K6935 N6941 K6944 E6945 G6946 F6947 F6948 Y6950 I6951 V6965 …	SAM binding site
S	ACE2/S-glycoprotein	6M0J	Chain A: S19 T20 I21 E22 E23 Q24 K26 T27 F28 L29 D30 K31 F32 N33 H34 E35 E37 D38 L39 F40 Y41 Q42 L45 W48 N49 N61 K68 F72 Q76 L79 Y83 Q89 V93 Q96 M323 T324 Q325 G326 F327 W328 E329 N330 D350 G352 K353 G354 D355 F356 R357 I379 M383 A386 A387 Q388 P389 F390 R393; Chain E: R346 S349 Y351 S375 T376 V401 R403 G404 D405 E406 V407 R408 Q409 G416 K417 D420 Y421 N437 N439 N440 L441 D442 S443 K444 V445 G446…	The binding region of ACE2 and S glycoprotein
	PPI surface (ACE2/S-glycoprotein)	6M0J	Chain E: R346 S349 Y351 S375 T376 V401 R403 G404 D405 E406 V407 R408 Q409 G416 K417 D420 Y421 N437 N439 N440 L441 D442 S443 K444 V445 G446 G447 N448 Y449 N450 Y451 L452 Y453 R454 L455 F456 R457 K458 S459 N460 D467 S469 T470 E471 I472 Y473 Q474 A475 G476 S477 T478 P479 C480 N481 G482 V483 E484 G485 F486 N487 C488 Y489 F490 P491 L492 Q493 S494 Y495 G496 F497 Q498 P499 T500 N501 G502 V503 G504 Y505 …	The site interacting with ACE2
	S2 subunit	6VYB	Chain A: N30 T33 F43 S45 S46 V47 L48 H49 S50 P57 F58 F59 S60 Q218 F220 R273 T274 L276 K278 Y279 N280 E281 T286 D287 A288 V289 D290 C291 A292 L293 D294 P295 L296 S297 E298 T299 K300 C301 T302 L303 K304 S305 F306 T307 V308 E309 K310 G311 I312 Y313 Q314 T315 S316 N317 F318 R319 V320 Q321 K557 R567 D568 I569 A570 T572 T573 D574 D586 I587 T588 P589 C590 S591 F592 G593 G594 V595 S596 V597 I598 T599 P60…	Mediates fusion of the virion and cellular membranes
N	Predicted binding site 1	6M3M	Chain A: N49 T50 A51 S52 F54 T55 A56 R89 R90 A91 T92 R93 R94 I95 L105 R108 Y110 Y112 P118 G130 T149 R150 N151 P152 A153 A156 A157 A174	unknown
	Predicted binding site 2	6M3M	Chain A: W53 F54 P74 I75 N76 T77 N78 S79 S80 P81 D83 Q84 F111 Y112 Y113 H146 I147 G148 T149 N154 N155 A156 A157 I158 V159 L160 Q161	unknown
	Predicted binding site 3	6M3M	Chain A: R69 G70 Q71 V73 P74 I75 N76 T77 S79 S80 P81 D82 Q84 A135 T136 E137 G138 A139 L162 P163 Q164 G165 T166	unknown
	Predicted binding site 4	6M3M	Chain A: Q59 K62 E63 D64 L65 K66 F67 P68 R69 Q71 R90 W109 Y124 G125 A126 N127 K128 D129 G130 I131 I132 W133 V134 A135 T167 P169 K170 F172	unknown
ACE2	Catalytic pocket	1R4L	Chain A: S47 N49 Y50 N51 T52 L120 S124 Y127 S128 L144 E145 P146 N149 E150 M152 A153 L176 W203 D269 M270 W271 R273 F274 T276 M332 T334 D335 P336 A342 V343 C344 H345 P346 T347 A348 W349 D350 L359 M360 C361 T362 K363 V364 D367 D368 L370 T371 H374 E375 H378 D382 H401 E402 E406 S409 T445 T449 T453 R460 L503 F504 H505 V506 N508 D509 Y510 S511 F512 R514 Y515 R518	Active site of carboxypeptidase that can cleave several endogenous substrates, including angiotensin II
	PPI surface (ACE2/S-glycoprotein)	6M0J	Chain A: S19 T20 I21 E22 E23 Q24 K26 T27 F28 L29 D30 K31 F32 N33 H34 E35 E37 D38 L39 F40 Y41 Q42 L45 W48 N49 N61 K68 F72 Q76 L79 Y83 Q89 V93 Q96 M323 T324 Q325 G326 F327 W328 E329 N330 D350 G352 K353 G354 D355 F356 R357 I379 M383 A386 A387 Q388 P389 F390 R393	The site interacting with S glycoprotein
TMPRSS2	Catalytic pocket	7MEQ	Chain A: I256 H279 V280 C281 H296 C297 E299 K300 P301 L302 S339 K340 T341 K342 D345 G383 A386 E389 K390 G391 K392 T393 V402 A423 M424 A427 G428 D435 S436 C437 Q438 G439 S441 T459 S460 W461 G462 S463 G464 C465 K467 R470 P471 G472 V473 Y474 G475	The substrate binding site, the region where the catalytic site is located.
DHODH	Catalytic pocket	7K2U	Chain A: E35 F37 Y38 A39 E40 H41 L42 M43 P44 T45 L46 Q47 L49 L50 D51 P52 E53 S54 A55 H56 R57 L58 A59 V60 F62 T63 L67 L68 P69 A95 A96 G97 F98 D99 K100 H101 E103 M111 G112 V134 F135 R136 P138 V143 Y147 N150 T285 S305 V333 Y356 T357 L359 T360 F361 W362 G363 P364 P365 V366 G368	Catalyzes the conversion of dihydroorotate
PAR-1	Active site	3VW7	Chain A: Y95 Y109 L150 F151 V154 K158 Y161 Y162 S172 C175 R176 F177 V178 T179 A180 A181 F182 Y183 C184 N185 M186 Y187 I190 L229 A232 G233 V234 P236 L237 L239 K240 E241 Q242 C254 H255 D256 V257 L258 E260 T261 L262 L263 E264 F271 S272 F274 S275 F278 F279 F280 I324 C325 P328 T329 N330 V331 L332 L333 I334 H336 Y337 S341 S344 A349 Y350 Y353 L354 C356 V357 V359 S360 S361	Inhibit PAR1 activation by the tethered ligand of PAR1
