# Supplementary material for: DrugDevCovid19: An Atlas of Anti-COVID-19 Compounds Derived By Computer-Aided Drug Design
Source: Research Square preprint supplement (doi:10.21203/rs.3.rs-1045472/v1), 2021-11-09
Supplement: Supplementary file 2 [file 9c9c46b8ef7609285f8d2dda.xlsx]

## Sheet: Table S1
Name	Short name	Alternative name(s)	Position(s)	Solved structures	Number of the solved structures	Solved complexes	Number of the solved complexes	Organism	Uniprot ID
Host translation inhibitor nsp1	nsp1	Leader protein, Non-structural protein 1	1 – 180	6ZP4,7K5I,6ZMO,6ZON,6ZLW,7O80,6ZM7,7K3N,6ZMT,6ZN5,7O81,6ZOJ,6ZMI,6ZOK,7O7Y,6ZME,7O7Z,7K7P,7EQ4,7JQC,7JQB	21	/	0	Severe acute respiratory syndrome coronavirus 2 (2019-nCoV) (SARS-CoV-2)	P0DTD1
Non-structural protein 3	nsp3, PL-PRO	PL2-PRO, Papain-like protease, Papain-like proteinase	819 – 2763	5RS7,5RS8,5RS9,5RSB,5RSC,5RSD,5RSE,5RSF,5RSG,5RSH,5RSI,5RSJ,5RSK,5RSL,5RSM,5RSN,5RSO,5RSP,5RSQ,5RSR,5RSS,5RST,5RSU,5RSV,5RSW,5RSX,5RSY,5RSZ,5RT0,5RT1,5RT2,5RT3,5RT4,5RT5,5RT6,5RT7,5RT8,5RT9,5RTA,5RTB,5RTC,5RTD,5RTE,5RTF,5RTG,5RTH,5RTI,5RTJ,5RTK,5RTL,5RTM,5RTN,5RTO,5RTP,5RTQ,5RTR,5RTS,5RTT,5RTU,5RTV,5RTW,5RTX,5RTY,5RTZ,5RU0,5RU1,5RU2,5RU3,5RU4,5RU5,5RU6,5RU7,5RU8,5RU9,5RUA,5RUC,5RUD,5RUE,5RUF,5RUG…	308	5RS7,5RS8,5RS9,5RSB,5RSC,5RSD,5RSE,5RSF,5RSG,5RSH,5RSI,5RSJ,5RSK,5RSL,5RSM,5RSN,5RSO,5RSP,5RSQ,5RSR,5RSS,5RST,5RSU,5RSV,5RSW,5RSX,5RSY,5RSZ,5RT0,5RVT,5RT1,5RT2,5RT3,5RT4,5RT5,5RT6,5RT7,5RT8,5RT9,5RTA,5RTB,5RTC,5RTD,5RTE,5RTF,5RTG,5RTH,5RTI,5RTJ,5RTK,5RTL,5RTM,5RTN,5RVO,5RTO,5RTP,5RTQ,5RTR,5RTS,5RVS,5RTT,5RTU,5RTV,5RTW,5RTX,5RTY,5RVM,5RTZ,5RU0,5RU1,5RU2,5RU3,5RU4,5RU5,5RU6,5RU7,5RU8,5RVP,5RU9,5RUA…	262	Severe acute respiratory syndrome coronavirus 2 (2019-nCoV) (SARS-CoV-2)	P0DTD1
3C-like proteinase	3CL-PRO, 3CLp, Mpro, nsp5	Main protease, Non-structural protein 5, SARS coronavirus main proteinase	3264 – 3569	5R7Y,5R7Z,5R80,5R81,5R82,5R83,5R84,5R8T,5RE4,5RE5,5RE6,5RE7,5RE8,5RE9,5REA,5REB,5REC,5RED,5REE,5REF,5REG,5REH,5REI,5REJ,5REK,5REL,5REM,5REN,5REO,5REP,5RER,5RES,5RET,5REU,5REV,5REW,5REX,5REY,5REZ,5RF0,5RF1,5RF2,5RF3,5RF4,5RF5,5RF6,5RF7,5RF8,5RF9,5RFA,5RFB,5RFC,5RFD,5RFE,5RFF,5RFG,5RFH,5RFI,5RFJ,5RFK,5RFL,5RFM,5RFN,5RFO,5RFP,5RFQ,5RFR,5RFS,5RFT,5RFU,5RFV,5RFW,5RFX,5RFY,5RFZ,5RG0,5RG1,5RG2,5RG3,5RGG…	369	5RL0,5RL1,5RL2,5RL3,5RL4,5RL5,6LU7,6LZE,6M0K,6M2N,6W63,6W79,6WNP,6WTJ,6WTK,6WTT,6XA4,6XBG,6XBH,6XBI,6XCH,6XFN,6XHM,6XMK,6XQS,6XQT,6XQU,6XR3,6Y2F,6Y2G,6YNQ,6ZRT,6ZRU,7A1U,7ADW,7AEG,7AEH,7AHA,7AK4,7AKU,7AMJ,7ANS,7AOL,7AP6,7APH,7AQE,7AQJ,7ARF,7AVD,7AWR,7AWS,7AWU,7AWW,7AX6,7AXM,7AXO,7AY7,7B3E,7B83,7BE7,7BFB,7BGP,7BQY,7BRP,7BUY,7C6S,7C6U,7C7P,7C8B,7C8R,7C8T,7C8U,7CA8,7CB7,7CBT,7COM,7CUT,7CUU,7CX9,7D1M…	177	Severe acute respiratory syndrome coronavirus 2 (2019-nCoV) (SARS-CoV-2)	P0DTD1
Non-structural protein 9	nsp9		4141 – 4253	6W4B,6W9Q,6WC1,6WXD,7BWQ,7CYQ,7EGQ,7KRI,7O7Y,7O7Z,7O80,7O81	12	/	0	Severe acute respiratory syndrome coronavirus 2 (2019-nCoV) (SARS-CoV-2)	P0DTD1
RNA-directed RNA polymerase	Pol, RdRp, nsp12	Non-structural protein 12	4393 – 5324	6M71,6XEZ,6XQB,6YYT,7AAP,7B3B,7B3C,7B3D,7BTF,7BV1,7BV2,7BW4,7BZF,7C2K,7CTT,7CXM,7CXN,7CYQ,7D4F,7EGQ,7KRN,7KRO,7KRP,7L1F,7O7Y,7O7Z,7O80,7O81	28	6XEZ,7AAP,7BV2,7CTT,7CYQ,7D4F,7KRN,7KRO,7KRP	9	Severe acute respiratory syndrome coronavirus 2 (2019-nCoV) (SARS-CoV-2)	P0DTD1
Helicase	Hel, nsp13	Non-structural protein 13	5325 – 5925	5RL6,5RL7,5RL8,5RL9,5RLB,5RLC,5RLD,5RLE,5RLF,5RLG,5RLH,5RLI,5RLJ,5RLK,5RLL,5RLM,5RLN,5RLO,5RLP,5RLQ,5RLR,5RLS,5RLT,5RLU,5RLV,5RLW,5RLY,5RLZ,5RM0,5RM1,5RM2,5RM3,5RM4,5RM5,5RM6,5RM7,5RM8,5RM9,5RMA,5RMB,5RMC,5RMD,5RME,5RMF,5RMG,5RMH,5RMI,5RMJ,5RMK,5RML,5RMM,5ROB,6XEZ,6ZSL,7CXM,7CXN,7CYQ,7EGQ,7KRN,7KRO,7NIO,7NN0,7NNG,7O7Y,7O7Z,7O80,7O81	67	5RL6,5RL7,5RL8,5RL9,5RLB,5RLC,5RLD,5RLE,5RLF,5RLG,5RLH,5RLI,5RLJ,5RLK,5RLL,5RLM,5RLN,5RLO,5RLP,5RLQ,5RLR,5RLS,5RLT,5RLU,5RLV,5RLW,5RLY,5RLZ,5RM0,5RM1,5RM2,5RM3,5RM4,5RM5,5RM6,5RM7,5RM8,5RM9,5RMA,5RMB,5RMC,5RMD,5RME,5RMF,5RMG,5RMH,5RMI,5RMJ,5RMK,5RML,5RMM,6XEZ,7CYQ,7KRN,7KRO,7NIO,7NN0,7NNG	58	Severe acute respiratory syndrome coronavirus 2 (2019-nCoV) (SARS-CoV-2)	P0DTD1
Proofreading exoribonuclease	ExoN, nsp14	Guanine-N7 methyltransferase, Non-structural protein 14	5926 – 6452	7DIY,7EGQ,7MC5,7MC6,7N0B,7N0C,7N0D,7O7Y,7O7Z,7O80,7O81	11	/	0	Severe acute respiratory syndrome coronavirus 2 (2019-nCoV) (SARS-CoV-2)	P0DTD1
Uridylate-specific endoribonuclease	nsp15	NendoU, Non-structural protein 15	6453 – 6798	5S6X,5S6Y,5S6Z,5S70,5S71,5S72,5SA4,5SA5,5SA6,5SA7,5SA8,5SA9,5SAA,5SAB,5SAC,5SAD,5SAE,5SAF,5SAG,5SAH,5SAI,6VWW,6W01,6WLC,6WXC,6X1B,6X4I,6XDH,7K0R,7K1L,7K1O,7K9P,7KEG,7KEH,7KF4,7ME0,7N06,7N33,7O7Y,7O7Z,7O80,7O81,7RB0,7RB2	44	5S6X,5S6Y,5S6Z,5S70,5S71,5S72,5SA5,5SAA,5SAB,5SAC,5SAE,5SAF,6WLC,6WXC,7K1L,7K1O	16	Severe acute respiratory syndrome coronavirus 2 (2019-nCoV) (SARS-CoV-2)	P0DTD1
2'-O-methyltransferase	nsp16	Non-structural protein 16	6799 – 7096	6W4H,6W61,6W75,6WJT,6WKQ,6WKS,6WQ3,6WRZ,6WVN,6XKM,6YZ1,7BQ7,7C2I,7C2J,7JHE,7JIB,7JPE,7JYY,7JZ0,7KOA,7L6R,7L6T,7LW3,7LW4,7O7Y,7O7Z,7O80,7O81	28	6W4H,6W61,6W75,6WJT,6WKQ,6WKS,6WQ3,6WRZ,6WVN,6XKM,6YZ1,7BQ7,7C2I,7C2J,7JHE,7JIB,7JPE,7JYY,7JZ0,7KOA,7L6R,7L6T,7LW3,7LW4	24	Severe acute respiratory syndrome coronavirus 2 (2019-nCoV) (SARS-CoV-2)	P0DTD1
Spike glycoprotein	S, S glycoprotein	E2, Peplomer protein	1 - 1273	6LVN,6LZG,6M0J,6M17,6VSB,6VXX,6VYB,6W41,6WPS,6WPT,6X29,6X2A,6X2B,6X2C,6X6P,6X79,6XC2,6XC3,6XC4,6XC7,6XCM,6XCN,6XDG,6XE1,6XEY,6XF5,6XF6,6XKL,6XKP,6XKQ,6XLU,6XM0,6XM3,6XM4,6XM5,6XR8,6XRA,6XS6,6YLA,6YM0,6YOR,6YZ5,6YZ7,6Z2M,6Z43,6Z97,6ZB4,6ZB5,6ZBP,6ZCZ,6ZDG,6ZDH,6ZER,6ZFO,6ZGE,6ZGG,6ZGH,6ZGI,6ZH9,6ZHD,6ZLR,6ZOW,6ZOX,6ZOY,6ZOZ,6ZP0,6ZP1,6ZP2,6ZP5,6ZP7,6ZWV,6ZXN,7A25,7A29,7A4N,7A5R,7A5S,7A91,7A92,7A93…	466	6ZB4,6ZB5,6ZP2,7B62,7DWY,7E7B,7E7B,7E7D,7JJI,7JJI,7NT9,7NTA,7NTC	13	Severe acute respiratory syndrome coronavirus 2 (2019-nCoV) (SARS-CoV-2)	P0DTC2
Nucleoprotein	N, NC, Protein N	Nucleocapsid protein	1 - 419	6M3M,6VYO,6WJI,6WKP,6WZO,6WZQ,6YI3,6YUN,6ZCO,7ACS,7ACT,7C22,7CDZ,7CE0,7CR5,7DE1,7N0I,7N0R,7N3C,7N3D,7R98	21	/	0	Severe acute respiratory syndrome coronavirus 2 (2019-nCoV) (SARS-CoV-2)	P0DTC9
Angiotensin-converting enzyme 2	ACE2	Angiotensin-converting enzyme homolog, Angiotensin-converting enzyme-related carboxypeptidase	1 - 805	1R42,1R4L,2AJF,3D0G,3D0H,3D0I,3KBH,3SCI,3SCJ,3SCK,3SCL,6ACG,6ACJ,6ACK,6CS2,6LZG,6M0J,6M17,6M18,6M1D,6VW1,7A91,7A92,7A94,7A95,7A96,7A97,7A98,7BH9,7CT5,7DDO,7DDP,7DF4,7DMU,7DWX,7DX4,7DX5,7DX6,7DX7,7DX8,7DX9,7E7E,7KJ2,7KJ3,7KJ4,7KMB,7KMS,7KMZ,7KNB,7KNE,7KNH,7KNI,7L0N,7L7F,7LO4,7MJM,7MJN,7NXC	58	1R4L	1	Homo sapiens (Human)	Q9BYF1
Transmembrane protease serine 2	TMPRSS2	Serine protease 10	1 - 492	7MEQ	1	7MEQ	1	Homo sapiens (Human)	O15393
Dihydroorotate dehydrogenase (quinone), mitochondrial	DHODH	Dihydroorotate oxidase	1 - 395	1D3G,1D3H,2B0M,2BXV,2FPT,2FPV,2FPY,2FQI,2PRH,2PRL,2PRM,2WV8,3F1Q,3FJ6,3FJL,3G0U,3G0X,3KVJ,3KVK,3KVL,3KVM,3U2O,3W7R,3ZWS,3ZWT,4IGH,4JGD,4JS3,4JTS,4JTT,4JTU,4LS0,4LS1,4LS2,4OQV,4RK8,4RKA,4RLI,4RR4,4YLW,4ZL1,4ZMG,5H2Z,5H73,5HIN,5HQE,5K9C,5K9D,5MUT,5MVC,5MVD,5TCE,5ZF4,5ZF7,5ZF8,5ZF9,5ZFA,5ZFB,6CJF,6CJG,6ET4,6FMD,6GK0,6IDJ,6J3B,6J3C,6JMD,6JME,6LP6,6LP7,6LP8,6LZL,6M2B,6OC0,6OC1,6QU7,6SYP,6VND,7K2U	79	1D3G,2B0M,2BXV,2FPT,2FPV,2FPY,2FQI,2PRH,2PRL,2WV8,3F1Q,3FJ6,3FJL,3G0U,3G0X,3KVJ,3KVK,3KVL,3KVM,3U2O,3W7R,3ZWS,3ZWT,4IGH,4JGD,4JS3,4JTS,4JTT,4JTU,4LS0,4LS1,4LS2,4OQV,4RK8,4RKA,4RLI,4RR4,4YLW,4ZL1,4ZMG,5H2Z,5H73,5HIN,5HQE,5K9D,5MUT,5MVC,5MVD,5ZF4,5ZF7,5ZF8,5ZF9,5ZFA,5ZFB,6CJF,6CJG,6ET4,6FMD,6GK0,6IDJ,6J3B,6J3C,6JMD,6JME,6LP6,6LP7,6LP8,6LZL,6M2B,6OC0,6OC1,6QU7,6SYP,6VND,7K2U	75	Homo sapiens (Human)	Q02127
Proteinase-activated receptor 1	PAR-1	Coagulation factor II receptor, Thrombin receptor	1 - 425	3BEF,3HKI,3HKJ,3LU9,3VW7	5	3VW7	1	Homo sapiens (Human)	P25116
